# Supplementary material for: A global eddying hindcast ocean simulation with OFES2
Source: Copernicus journal article supplement (doi:10.5194/gmd-2019-351), 2020-02-03
Supplement: Supplementary file 1 [file gmd-2019-351-supplement.pdf]

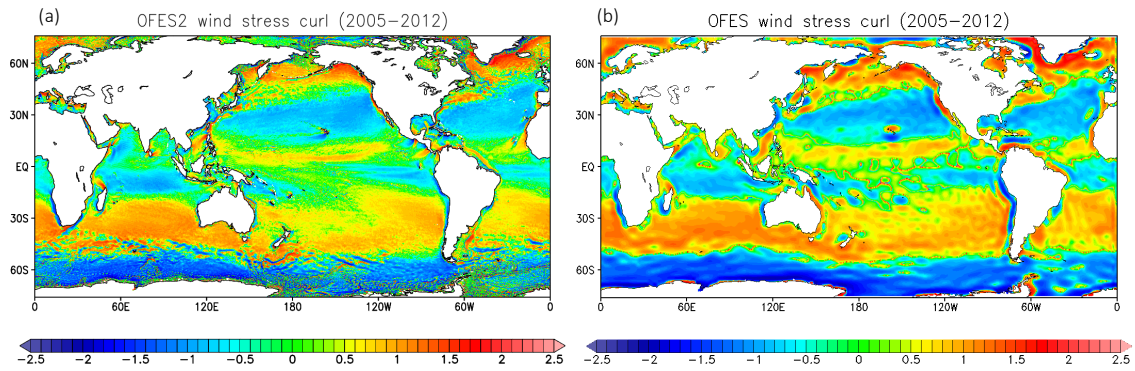

**Figure S1: Mean surface wind stress curl in common logarithm scale ( $10^{-7}$  N m $^{-3}$ ) averaged over 2005-2012 in (a) OFES2 and (b) OFES forced by JRA55-do and NCEP reanalysis respectively.**

5

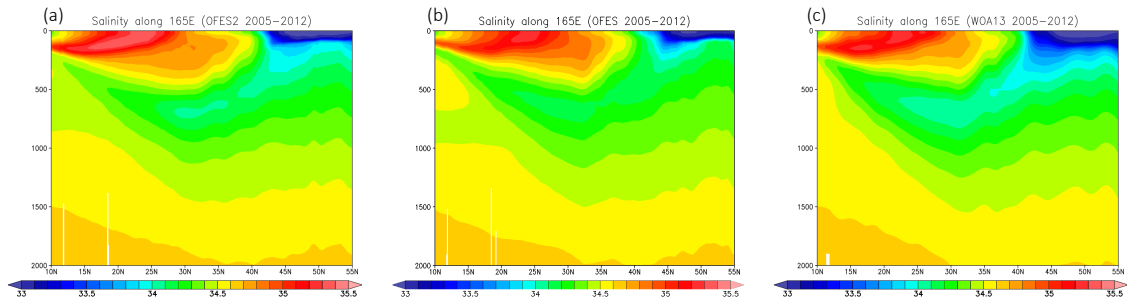

**10 Figure S2: Meridional section of salinity (psu) along 165°E in the North Pacific in (a) OFES2, (b) OFES, and (c) WOA13 observations averaged over 2005-2012. The salinity distribution of the NPIW is slightly improved in OFES2 with the tidal mixing scheme compared with OFES.**

15

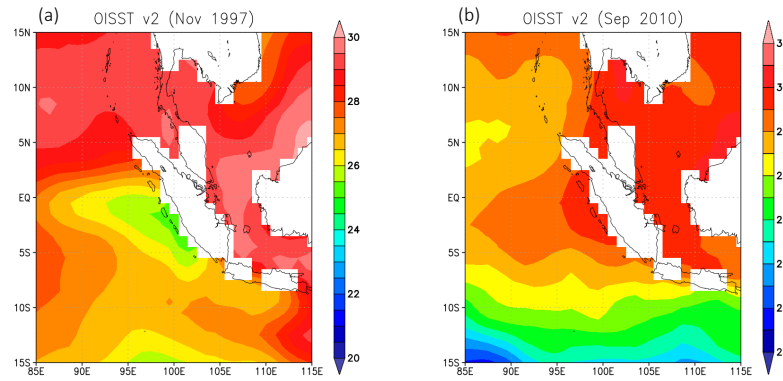

**Figure S3: SST (°C) in the region including IOD eastern pole (90°-110°E and 10°S-0°) in mature month of (a) 1997 positive IOD event (Nov 1997) and (b) 2010 negative IOD event (in Sep 2010) based on OISST v2 (Reynolds 1988).**
